# Supplementary material for: Blinatumomab in pediatric relapsed/refractory B-cell acute lymphoblastic leukemia: RIALTO expanded access study final analysis
Source: PubMed Central journal article supplement — Blood Adv. 2022 Feb 4;6(3):1004–14. doi: 10.1182/bloodadvances.2021005579 (PMC8945309; doi:10.1182/bloodadvances.2021005579), 2022-02-04
Supplement: advancesADV2021005579-suppl1.pdf [file advancesADV2021005579-suppl1.pdf]

## Supplemental Materials

### **RIALTO Expanded Access Study Final Analysis: Blinatumomab In Pediatric Relapsed/Refractory B-cell Precursor Acute Lymphoblastic Leukemia**

Franco Locatelli, Gerhard Zugmaier, Noemi Mergen, Peter Bader, Sima Jeha, Paul-Gerhardt Schlegel, Jean-Pierre Bourquin, Rupert Handgretinger, Benoit Brethon, Claudia Rössig, William N. Kormany, Puneeth Viswagnachar, and Christiane Chen-Santel

|                                                                                                                   |    |
|-------------------------------------------------------------------------------------------------------------------|----|
| Figure S1: Overall survival after alloHSCT by MRD response. ....                                                  | 1  |
| Supplemental Table 1: Principal Investigators by Country.....                                                     | 1  |
| Supplemental Table 2: Subject Incidence of Treatment-Emergent Adverse Events, Any Grade with > 5% Incidence ..... | 2  |
| Supplemental Table 3: Subject Incidence of Treatment-Related Adverse Events, Any Grade with > 2% Incidence .....  | 4  |
| Supplemental Table 4: Subject Incidence of Grade $\geq 3$ Treatment-Emergent Adverse Events .....                 | 5  |
| Supplemental Table 5: Subject Incidence of Grade $\geq 3$ Treatment-Related Adverse Events .....                  | 8  |
| Supplemental Table 6: Subject Incidence of Treatment-Related Neurologic Events.....                               | 10 |
| Supplemental Table 7: HSCT Following Treatment with Blinatumomab .....                                            | 11 |

**Figure S1: Overall survival after alloHSCT by MRD response.** Vertical bars indicate censoring. Overall survival was defined from the start of blinatumomab infusion until death. Overall survival after alloHSCT was analyzed according to MRD response using the Kaplan-Meier method.

**Figure S1**

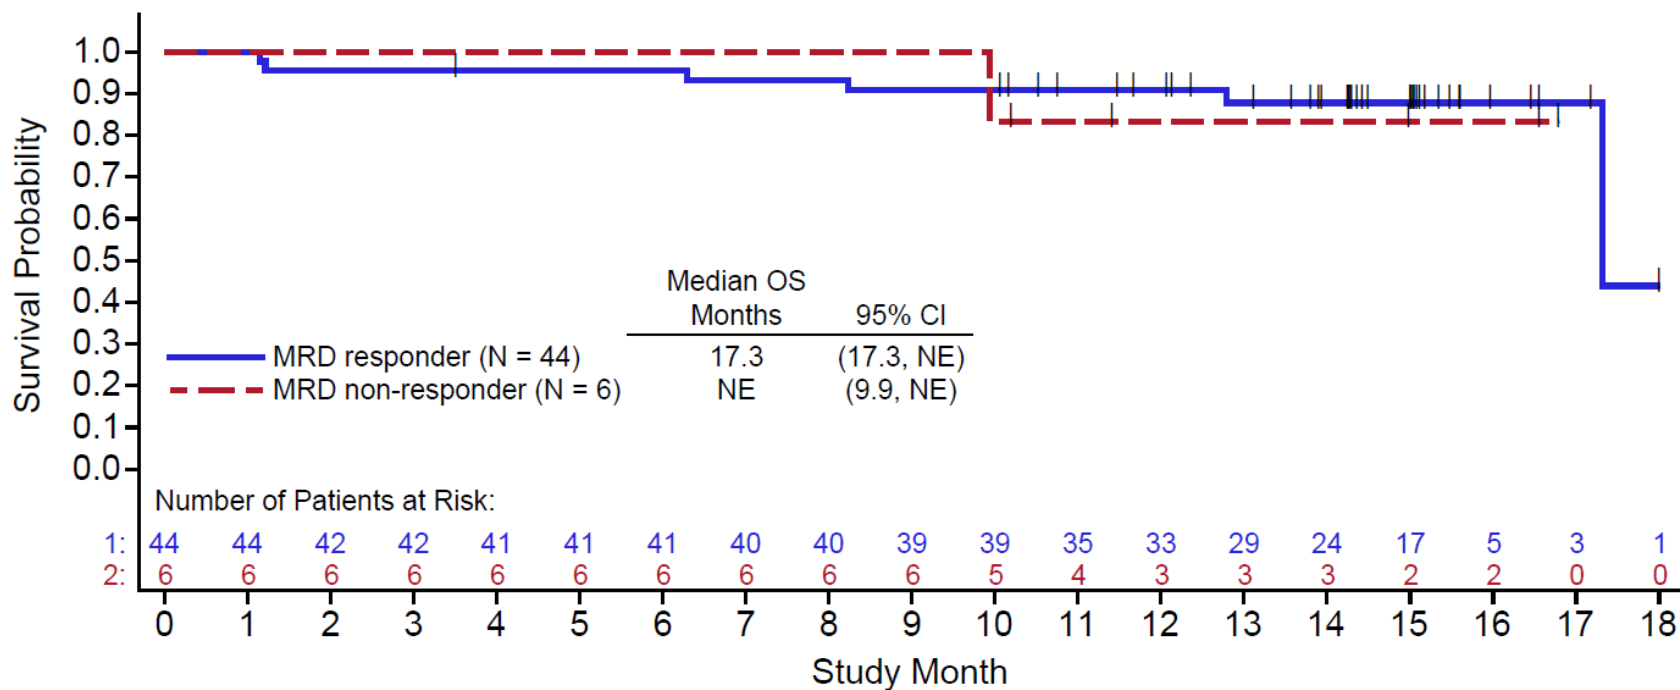

Censor indicated by vertical bar |  
 Months = Days/30.5  
 Figure includes retreatment data (treated as cycle 2) for one subject

**Supplemental Table 1: Principal Investigators by Country**

| <b>Country</b> | <b>Principal Investigator</b>                                                                                                |
|----------------|------------------------------------------------------------------------------------------------------------------------------|
| Austria        | Christina Peters                                                                                                             |
| France         | Benoit Brethon<br>Gérard Michel                                                                                              |
| Germany        | Peter Bader<br>Christiane Chen-Santel<br>Rupert Handgretinger<br>Claudia Rössig<br>Paul Gerhardt Schlegel<br>Martin Schrappe |
| Italy          | Giuseppe Basso<br>Franco Locatelli                                                                                           |
| Switzerland    | Jean-Pierre Bourquin                                                                                                         |
| United Kingdom | Katharine Patrick                                                                                                            |
| United States  | Phillip Barnette<br>Sima Jeha<br>Maureen O'Brien                                                                             |

**Supplemental Table 2: Subject Incidence of Treatment-Emergent Adverse Events, Any Grade with > 5% Incidence**

|                                      | Patients treated with blinatumomab (N = 110)<br>n (%) |
|--------------------------------------|-------------------------------------------------------|
| Patients reporting TEAEs             | 71 (64.5)                                             |
| Pyrexia                              | 92 (83.6)                                             |
| Vomiting                             | 30 (27.3)                                             |
| Headache                             | 27 (24.5)                                             |
| Cytokine release syndrome            | 22 (20.0)                                             |
| Anemia                               | 20 (18.2)                                             |
| Nausea                               | 20 (18.2)                                             |
| Cough                                | 19 (17.3)                                             |
| Pain                                 | 18 (16.4)                                             |
| Hypotension                          | 14 (12.7)                                             |
| Pain in extremity                    | 14 (12.7)                                             |
| Abdominal pain                       | 12 (10.9)                                             |
| Hypokalemia                          | 12 (10.9)                                             |
| Platelet count decreased             | 12 (10.9)                                             |
| Rash                                 | 12 (10.9)                                             |
| Alanine aminotransferase increased   | 11 (10.0)                                             |
| Constipation                         | 11 (10.0)                                             |
| Febrile neutropenia                  | 11 (10.0)                                             |
| Fluid balance positive               | 11 (10.0)                                             |
| Neutropenia                          | 11 (10.0)                                             |
| Back pain                            | 10 (9.1)                                              |
| Diarrhea                             | 10 (9.1)                                              |
| Thrombocytopenia                     | 10 (9.1)                                              |
| Hypertension                         | 9 (8.2)                                               |
| Rhinitis                             | 8 (7.3)                                               |
| Stomatitis                           | 8 (7.3)                                               |
| Tremor                               | 8 (7.3)                                               |
| Aspartate aminotransferase increased | 7 (6.4)                                               |
| C-reactive protein increased         | 7 (6.4)                                               |
| Chills                               | 7 (6.4)                                               |
| Fatigue                              | 7 (6.4)                                               |
| Fluid retention                      | 7 (6.4)                                               |
| Pruritus                             | 7 (6.4)                                               |
| Abdominal pain upper                 | 6 (5.5)                                               |
| Bone pain                            | 6 (5.5)                                               |

|                                     |         |
|-------------------------------------|---------|
| Dry skin                            | 6 (5.5) |
| Epistaxis                           | 6 (5.5) |
| Fluid overload                      | 6 (5.5) |
| Gamma-glutamyltransferase increased | 6 (5.5) |
| Hypocalcaemia                       | 6 (5.5) |
| Sepsis                              | 6 (5.5) |
| Tachycardia                         | 6 (5.5) |

Retreatment data (treated as cycle 2) for one patient is included.

Adverse events coded using MedDRA version 22.1.

Severity graded using CTCAE v4.03.

**Supplemental Table 3: Subject Incidence of Treatment-Related Adverse Events, Any Grade with > 2% Incidence**

|                                     | Patients treated with blinatumomab (N = 110)<br>n (%) |
|-------------------------------------|-------------------------------------------------------|
| Patients reporting TRAEs, any grade | 81 (73.6)                                             |
| Pyrexia                             | 63 (57.3)                                             |
| Cytokine release syndrome           | 18 (16.4)                                             |
| Headache                            | 11 (10.0)                                             |
| Vomiting                            | 11 (10.0)                                             |
| Nausea                              | 8 (7.3)                                               |
| Tremor                              | 6 (5.5)                                               |
| Chills                              | 5 (4.5)                                               |
| Hypotension                         | 5 (4.5)                                               |
| Rash                                | 5 (4.5)                                               |
| C-reactive protein increased        | 4 (3.6)                                               |
| Hypertension                        | 4 (3.6)                                               |
| Hypokalemia                         | 4 (3.6)                                               |
| Pain                                | 4 (3.6)                                               |
| Pain in extremity                   | 4 (3.6)                                               |
| Seizure                             | 4 (3.6)                                               |
| Tachycardia                         | 4 (3.6)                                               |
| Tumor lysis syndrome                | 4 (3.6)                                               |
| Abdominal pain                      | 3 (2.7)                                               |
| Anemia                              | 3 (2.7)                                               |
| Dry skin                            | 3 (2.7)                                               |
| Febrile neutropenia                 | 3 (2.7)                                               |
| Hypocalcemia                        | 3 (2.7)                                               |
| Edema                               | 3 (2.7)                                               |

Retreatment data (treated as cycle 2) for one patient is included.

Adverse events coded using MedDRA version 22.1.

Severity graded using CTCAE v4.03.

**Supplemental Table 4: Subject Incidence of Grade  $\geq$  3 Treatment-Emergent Adverse Events**

|                                         | Patients treated with blinatumomab (N = 110)<br>n (%) |
|-----------------------------------------|-------------------------------------------------------|
| Patients reporting grade $\geq$ 3 TEAEs | 71 (64.5)                                             |
| Pyrexia                                 | 15 (13.6)                                             |
| Platelet count decreased                | 11 (10.0)                                             |
| Febrile neutropenia                     | 10 (9.1)                                              |
| Hypokalemia                             | 8 (7.3)                                               |
| Neutropenia                             | 8 (7.3)                                               |
| Alanine aminotransferase increased      | 7 (6.4)                                               |
| Acute lymphocytic leukemia              | 5 (4.5)                                               |
| Anemia                                  | 5 (4.5)                                               |
| Thrombocytopenia                        | 5 (4.5)                                               |
| White blood cell count decreased        | 5 (4.5)                                               |
| Aspartate aminotransferase increased    | 4 (3.6)                                               |
| Device related infection                | 4 (3.6)                                               |
| Gamma-glutamyltransferase increased     | 4 (3.6)                                               |
| Sepsis                                  | 4 (3.6)                                               |
| C-reactive protein increased            | 3 (2.7)                                               |
| Hepatic enzyme increased                | 3 (2.7)                                               |
| Hypertransaminasemia                    | 3 (2.7)                                               |
| Tumor lysis syndrome                    | 3 (2.7)                                               |
| Bacteremia                              | 2 (1.8)                                               |
| Cytokine release syndrome               | 2 (1.8)                                               |
| Cytopenia                               | 2 (1.8)                                               |
| Device related sepsis                   | 2 (1.8)                                               |
| Headache                                | 2 (1.8)                                               |
| Hypertension                            | 2 (1.8)                                               |
| Hypoalbuminemia                         | 2 (1.8)                                               |
| Hyponatremia                            | 2 (1.8)                                               |
| Hypotension                             | 2 (1.8)                                               |
| Infection                               | 2 (1.8)                                               |
| Leukemia recurrent                      | 2 (1.8)                                               |
| Neutrophil count decreased              | 2 (1.8)                                               |
| Pain                                    | 2 (1.8)                                               |
| Stomatitis                              | 2 (1.8)                                               |
| Acute kidney injury                     | 1 (0.9)                                               |

|                                                  |         |
|--------------------------------------------------|---------|
| Acute lymphocytic leukemia                       | 1 (0.9) |
| Acute myeloid leukemia                           | 1 (0.9) |
| Agitation                                        | 1 (0.9) |
| Bacterial infection                              | 1 (0.9) |
| Bacterial sepsis                                 | 1 (0.9) |
| Bacterial test positive                          | 1 (0.9) |
| Bile duct stone                                  | 1 (0.9) |
| Blood bilirubin increased                        | 1 (0.9) |
| Blood creatine increased                         | 1 (0.9) |
| Blood fibrinogen increased                       | 1 (0.9) |
| Blood lactate dehydrogenase increased            | 1 (0.9) |
| Blood phosphorus decreased                       | 1 (0.9) |
| Blood uric acid increased                        | 1 (0.9) |
| Bronchopulmonary aspergillosis                   | 1 (0.9) |
| Candida infection                                | 1 (0.9) |
| Cardiac failure                                  | 1 (0.9) |
| Chest pain                                       | 1 (0.9) |
| Colitis                                          | 1 (0.9) |
| Depressed level of consciousness                 | 1 (0.9) |
| Device defective                                 | 1 (0.9) |
| Device dislocation                               | 1 (0.9) |
| Diarrhea                                         | 1 (0.9) |
| Diarrhea infectious                              | 1 (0.9) |
| Disseminated intravascular coagulation           | 1 (0.9) |
| Dyspnea                                          | 1 (0.9) |
| Fungal infection                                 | 1 (0.9) |
| Gastroenteritis viral                            | 1 (0.9) |
| Hemoglobin decreased                             | 1 (0.9) |
| Hepatic failure                                  | 1 (0.9) |
| Hyperbilirubinemia                               | 1 (0.9) |
| Hypercalcemia                                    | 1 (0.9) |
| Hypophosphatemia                                 | 1 (0.9) |
| Inappropriate schedule of product administration | 1 (0.9) |
| Leukemic infiltration extramedullary             | 1 (0.9) |
| Leukopenia                                       | 1 (0.9) |
| Lymph gland infection                            | 1 (0.9) |
| Lymphocytic leukemia                             | 1 (0.9) |
| Platelet disorder                                | 1 (0.9) |
| Pruritus                                         | 1 (0.9) |



|                             |         |
|-----------------------------|---------|
| Pseudomonas infection       | 1 (0.9) |
| Seizure                     | 1 (0.9) |
| Soft tissue infection       | 1 (0.9) |
| Trigeminal nerve disorder   | 1 (0.9) |
| Urticaria                   | 1 (0.9) |
| Vomiting                    | 1 (0.9) |
| Weight decreased            | 1 (0.9) |
| White blood count increased | 1 (0.9) |

Retreatment data (treated as cycle 2) for one patient is included.

Adverse events coded using MedDRA version 22.1.

Severity graded using CTCAE v4.03.

**Supplemental Table 5: Subject Incidence of Grade  $\geq$  3 Treatment-Related Adverse Events**

|                                         | Patients treated with blinatumomab (N = 110)<br>n (%) |
|-----------------------------------------|-------------------------------------------------------|
| Patients reporting grade $\geq$ 3 TRAEs | 29 (26.4)                                             |
| Pyrexia                                 | 11 (10.0)                                             |
| Febrile neutropenia                     | 3 (2.7)                                               |
| Hypokalaemia                            | 3 (2.7)                                               |
| Cytokine release syndrome               | 2 (1.8)                                               |
| Headache                                | 2 (1.8)                                               |
| Hypotension                             | 2 (1.8)                                               |
| Tumor lysis syndrome                    | 2 (1.8)                                               |
| Acute kidney injury                     | 1 (0.9)                                               |
| Acute myeloid leukemia                  | 1 (0.9)                                               |
| Alanine aminotransferase increased      | 1 (0.9)                                               |
| Aspartate aminotransferase increased    | 1 (0.9)                                               |
| Bacterial infection                     | 1 (0.9)                                               |
| Blood bilirubin increased               | 1 (0.9)                                               |
| Blood creatine increased                | 1 (0.9)                                               |
| Blood uric acid increased               | 1 (0.9)                                               |
| Depressed level of consciousness        | 1 (0.9)                                               |
| Device related infection                | 1 (0.9)                                               |
| Device related sepsis                   | 1 (0.9)                                               |
| Gamma-glutamyltransferase increased     | 1 (0.9)                                               |
| Hyperbilirubinaemia                     | 1 (0.9)                                               |
| Hypertension                            | 1 (0.9)                                               |
| Leukemia recurrent                      | 1 (0.9)                                               |
| Lymph gland infection                   | 1 (0.9)                                               |
| Neutropenia                             | 1 (0.9)                                               |
| Neutrophil count decreased              | 1 (0.9)                                               |
| Pain                                    | 1 (0.9)                                               |
| Platelet count decreased                | 1 (0.9)                                               |
| Seizure                                 | 1 (0.9)                                               |
| Sepsis                                  | 1 (0.9)                                               |

|                                  |         |
|----------------------------------|---------|
| Soft tissue infection            | 1 (0.9) |
| White blood cell count decreased | 1 (0.9) |

Retreatment data (treated as cycle 2) for one patient is included.

Adverse events coded using MedDRA version 22.1.

Severity graded using CTCAE v4.03.

**Supplemental Table 6: Subject Incidence of Treatment-Related Neurologic Events**

|                                                        | Patients treated with blinatumomab<br>(N = 110)<br>n (%) |
|--------------------------------------------------------|----------------------------------------------------------|
| Patients reporting treatment-related neurologic events | 22 (20.0)                                                |
| Nervous system disorders                               | 20 (18.2)                                                |
| Headache                                               | 11 (10.0)                                                |
| Tremor                                                 | 6 (5.5)                                                  |
| Seizure                                                | 4 (3.6)                                                  |
| Ataxia                                                 | 2 (1.8)                                                  |
| Depressed level of consciousness                       | 2 (1.8)                                                  |
| Dizziness                                              | 2 (1.8)                                                  |
| Amnesia                                                | 1 (0.9)                                                  |
| Aphasia                                                | 1 (0.9)                                                  |
| Dysarthria                                             | 1 (0.9)                                                  |
| Generalized tonic-clonic seizure                       | 1 (0.9)                                                  |
| Meningism                                              | 1 (0.9)                                                  |
| Paraesthesia                                           | 1 (0.9)                                                  |
| VIth nerve paralysis                                   | 1 (0.9)                                                  |
| Psychiatric disorders                                  | 4 (3.6)                                                  |
| Agitation                                              | 1 (0.9)                                                  |
| Insomnia                                               | 1 (0.9)                                                  |
| Irritability                                           | 1 (0.9)                                                  |
| Sleep disorders                                        | 1 (0.9)                                                  |

Retreatment data (treated as cycle 2) for one patient is included.

Table includes only 'Nervous system disorders' or 'Psychiatric disorders' in adverse event body system organ class search criteria.

Adverse events coded using MedDRA version 22.1.

Severity graded using CTCAE v4.03.

**Supplemental Table 7: HSCT Following Treatment with Blinatumomab**

|                               | Blinatumomab(N = 58)<br>n (%) |
|-------------------------------|-------------------------------|
| Type of last HSCT             |                               |
| Autologous                    | 0 (0.0)                       |
| Allogeneic                    | 58 (100.0)                    |
| Stem cell source of last HSCT |                               |
| Peripheral blood              | 20 (34.5)                     |
| Bone marrow                   | 36 (62.1)                     |
| Cord blood                    | 1 (1.7)                       |
| Unknown                       | 1 (1.7)                       |
| Donor type of last alloHSCT   |                               |
| Sibling                       | 5 (8.6)                       |
| Haploidentical (mother)       | 19 (32.8)                     |
| Haploidentical (father)       | 13 (22.4)                     |
| Unrelated                     | 21 (36.2)                     |

N includes all patients who received HSCT any time after the first blinatumomab infusion.

Only the information from the most recent HSCT per patient is included.

Table includes retreatment data (treated as cycle 2) for one patient.

HSCT, hematopoietic stem cell transplant.
